# Supplementary material
Source: HighWire-hosted journal article supplement (https://bmjopenquality.bmj.com/highwire/filestream/135954/field_highwire_adjunct_files/1/Table_2.docx)
Supplement: Table_2.docx [file Table_2.docx]

|  | **Staff competency in using PICCs*** | | | **Staff confidence levels in using PICCs**** | | |
| --- | --- | --- | --- | --- | --- | --- |
| **Pre-teaching** | **Post-teaching** | **Absolute Improvement** | **Pre-teaching** | **Post-teaching** | **Absolute Improvement** |
| **Junior doctors at DGH (n=30)** | **6%** | **70%** | **64%** | **38%** | **66%** | **28%** |
| **Nurses on T&O ward (n=8)** | **0%** | **38%** | **38%** | **65%** | **80%** | **15%** |

**Table 2. Staff competency and confidence in PICC care pre- and post-teaching session**

*** assessed by a multiple choice question test; result presented as a percentage correct answers**

**** self-assessment by staff on a scale of 1 (0% confidence) to 5 (100% confidence)**
